# Supplementary material
Source: PubMed Central journal article supplement (PMC4106694)
Supplement: ic5008439_si_001.pdf [file ic5008439_si_001.pdf]

# Supporting Information

## A prodigiosin analog designed for metal coordination: Stable zinc and copper pyrrolyldipyrins

*Tsuhen M. Chang<sup>§</sup>, Sanhita Sinharay<sup>§</sup>, Andrei V. Astashkin, Elisa Tomat\**

University of Arizona, Department of Chemistry and Biochemistry, Tucson, AZ 85721, USA

### Contents

NMR Analysis (Figures S1-S6, Schemes S1-S2)

X-Ray Diffraction Analysis (Figure S7, Table S1)

EPR and Pulsed ENDOR Analysis (Figure S8)

## NMR Analysis

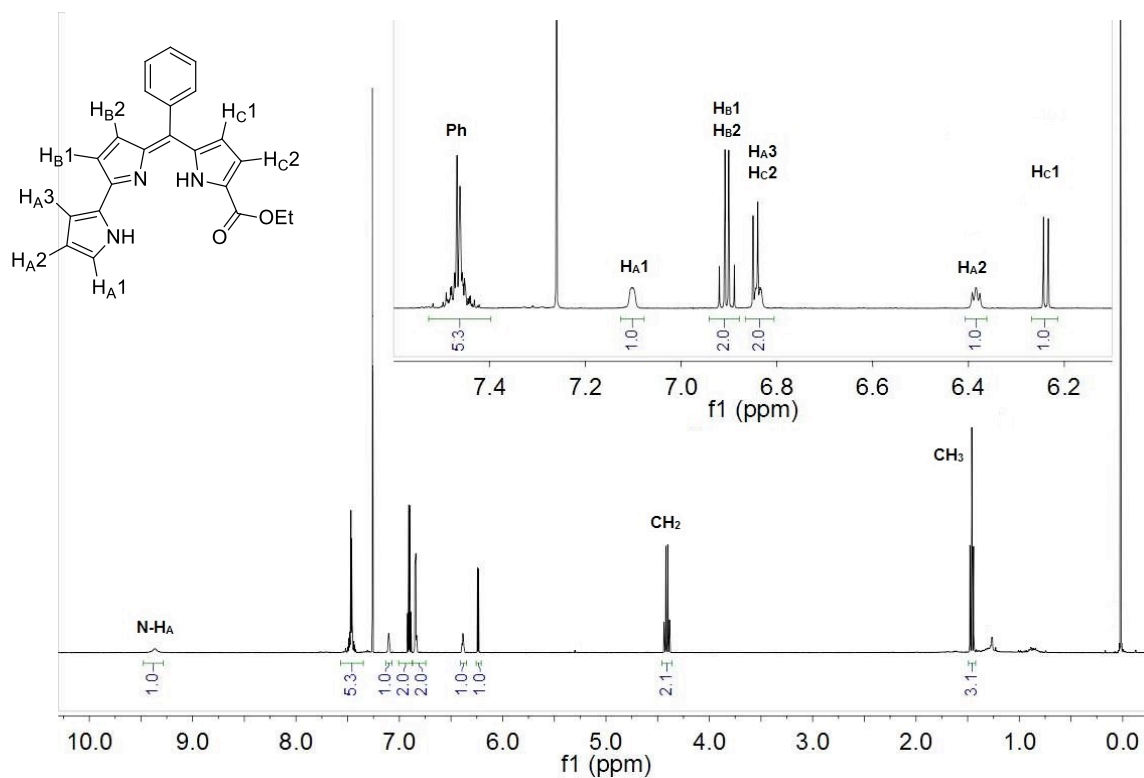

**Figure S1.**  $^1\text{H}$  NMR spectrum of free base ligand  $\text{H}_2\text{PD1}$  (400 MHz,  $\text{CDCl}_3$ , 27 °C). Resonances were assigned based on COSY and NOESY correlation data (see below).

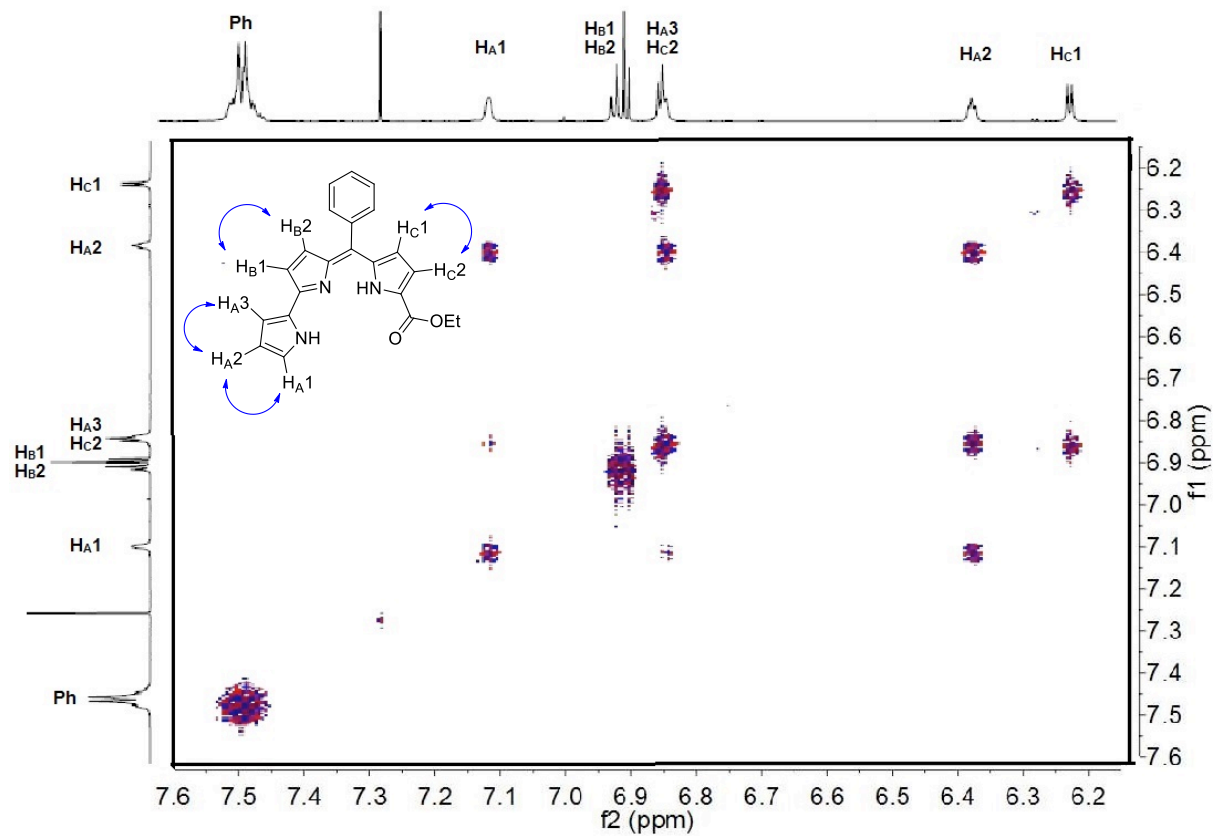

**Figure S2.** 2D COSY NMR plot of H<sub>2</sub>PD1 (600 MHz, CDCl<sub>3</sub>, 27 °C, 40 mM) showing the assignment of observed cross-peaks.

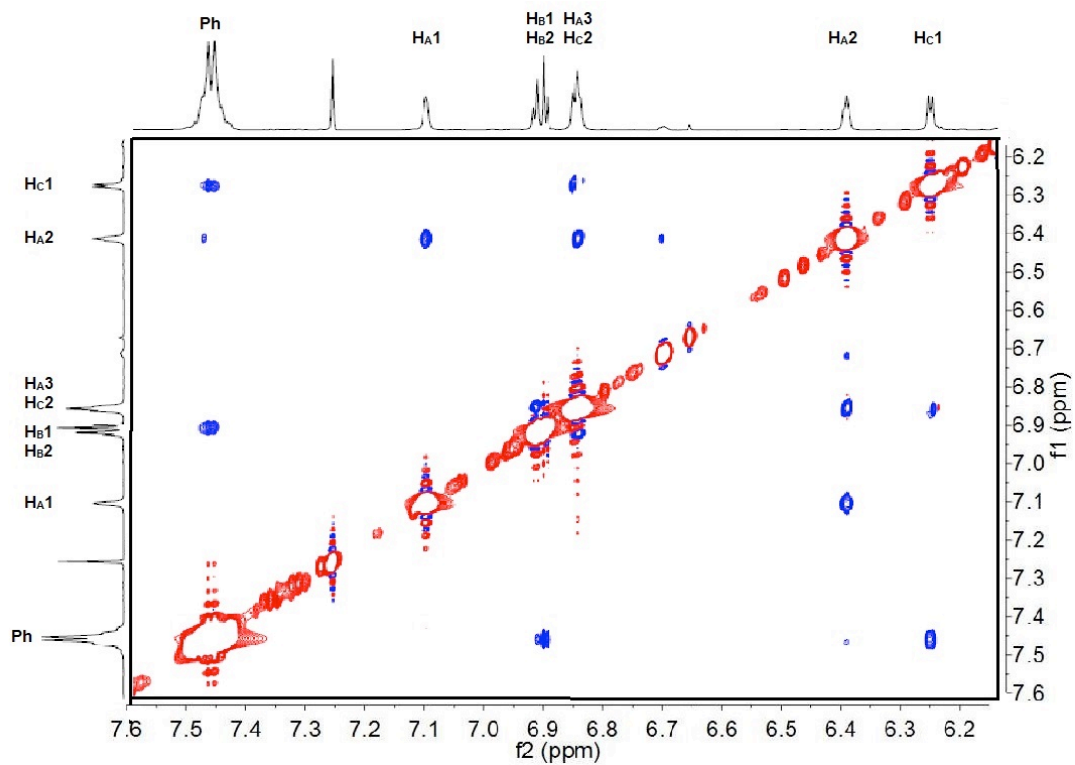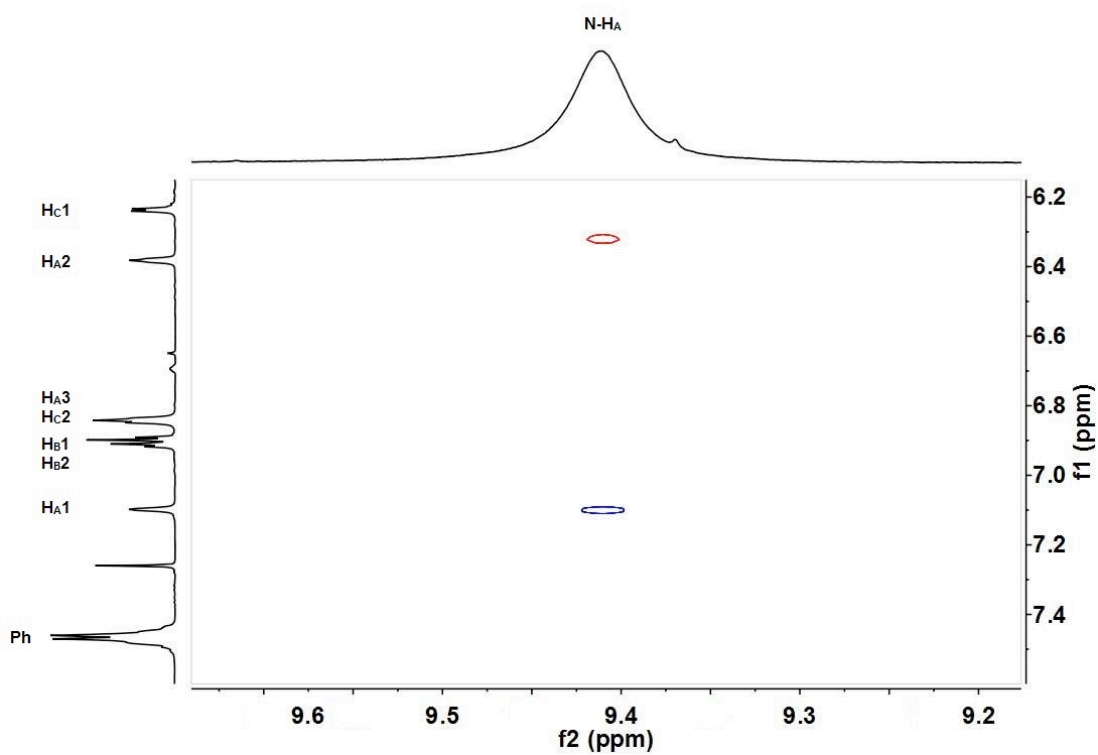

**Figure S3.** Portions of 2D NOESY NMR plot of H<sub>2</sub>PD1 (600 MHz, CDCl<sub>3</sub>, 27 °C, 40 mM) showing relevant crosspeaks for the assignment illustrated in Scheme S1.

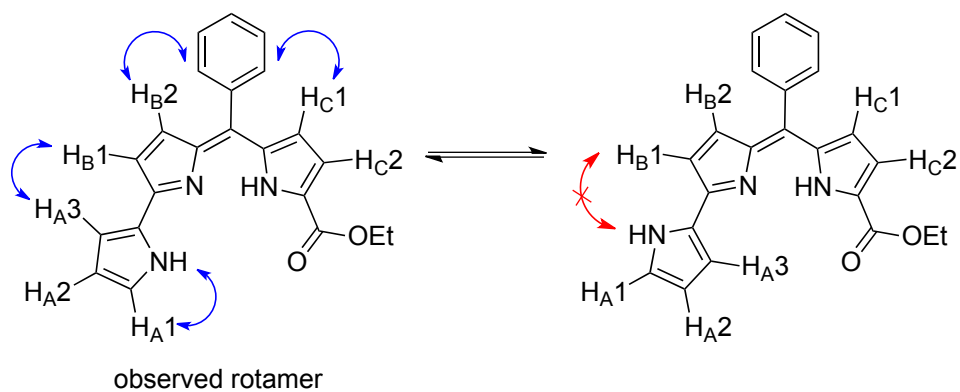

**Scheme S1.** Assignment of rotameric structure for H<sub>2</sub>PD1 based on observed NOESY crosspeaks.

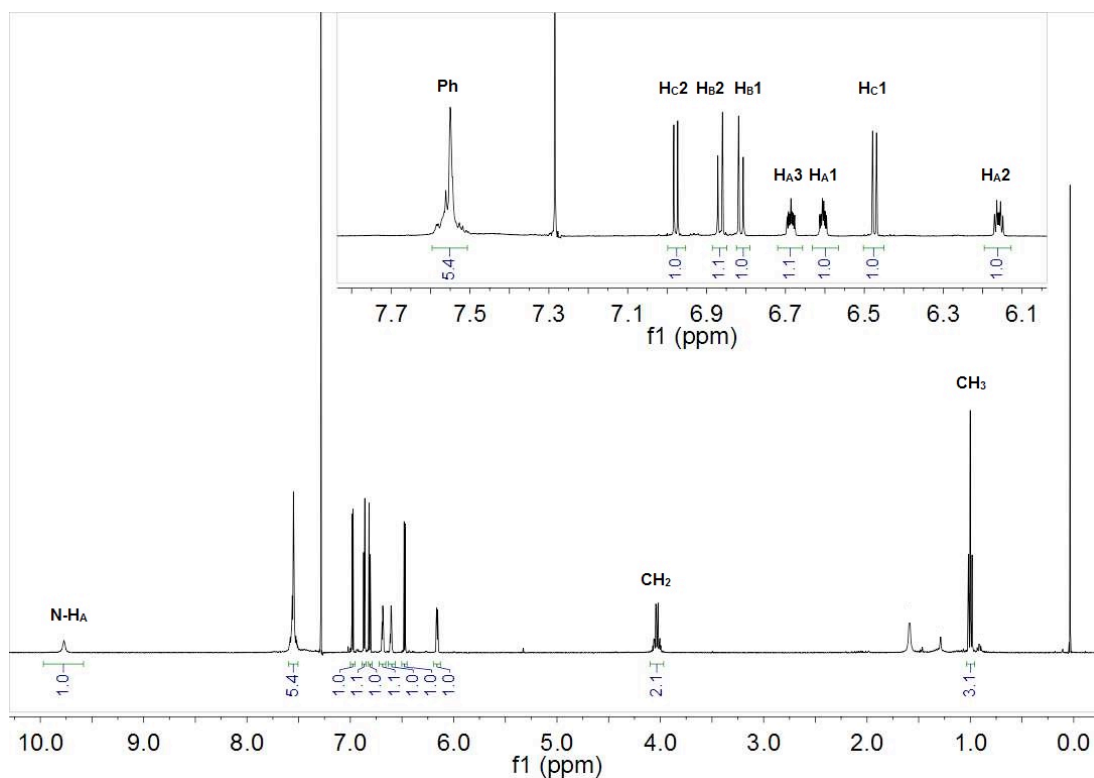

**Figure S4.** <sup>1</sup>H NMR spectrum of Zn(HPD1)<sub>2</sub> (400 MHz, CDCl<sub>3</sub>, 27 °C). Resonances were assigned based on COSY and NOESY correlation data (see below).

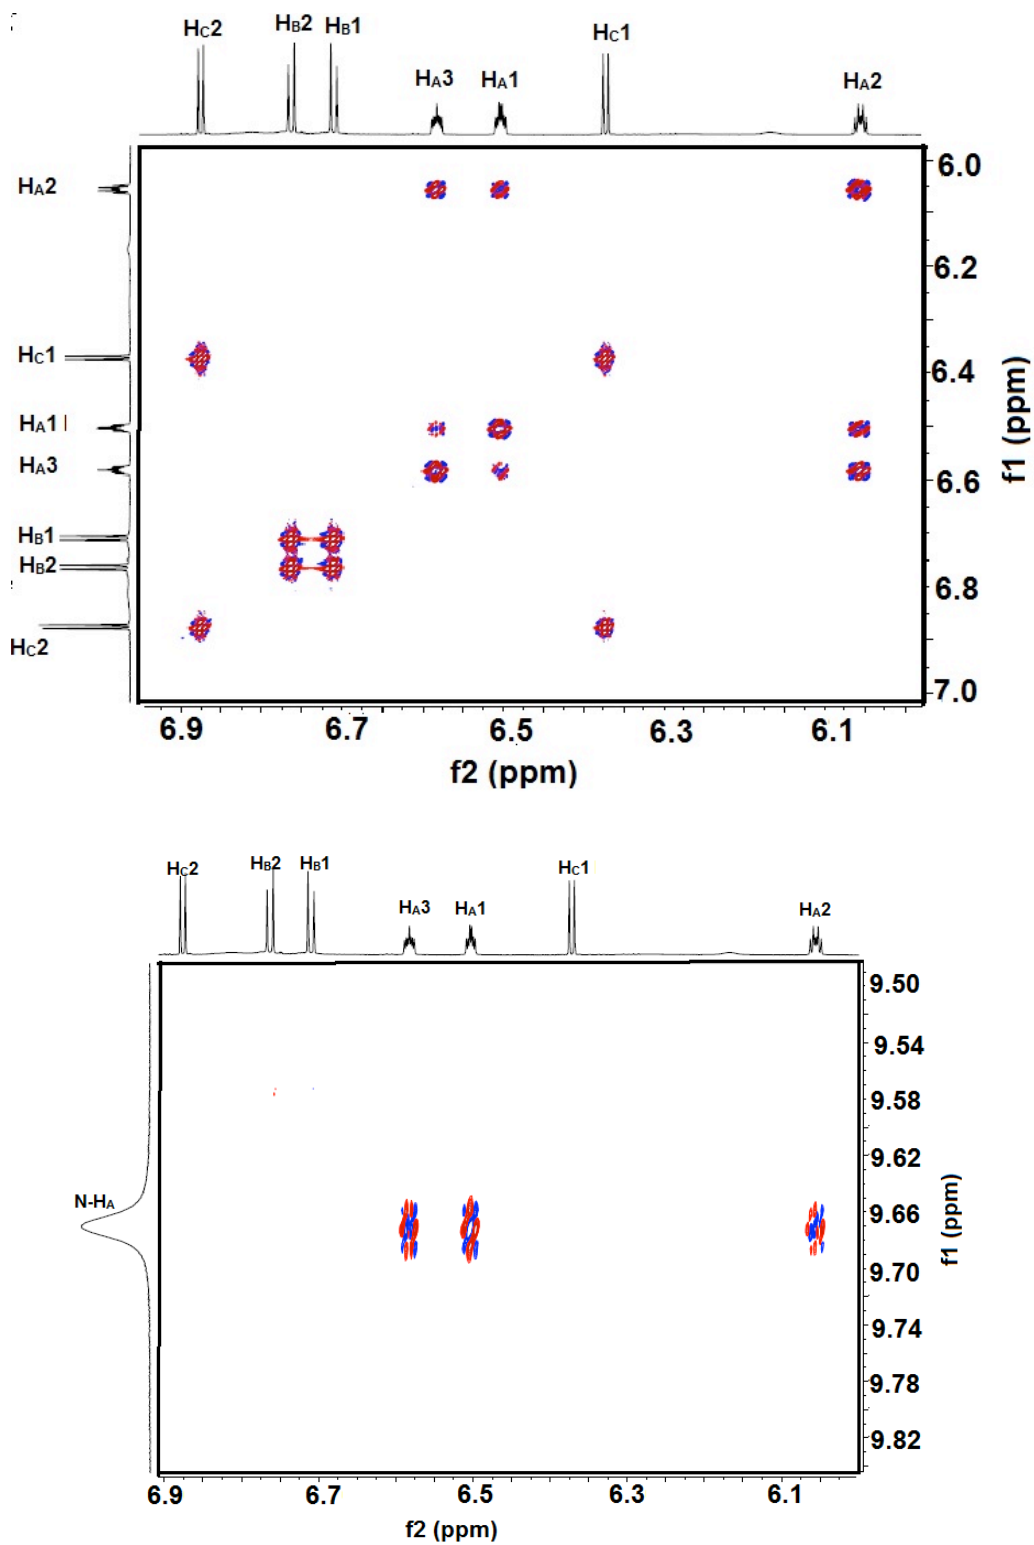

**Figure S5.** 2D COSY NMR plots for Zn(HPD1)<sub>2</sub> (600 MHz, CDCl<sub>3</sub>, 27 °C, 11 mM).

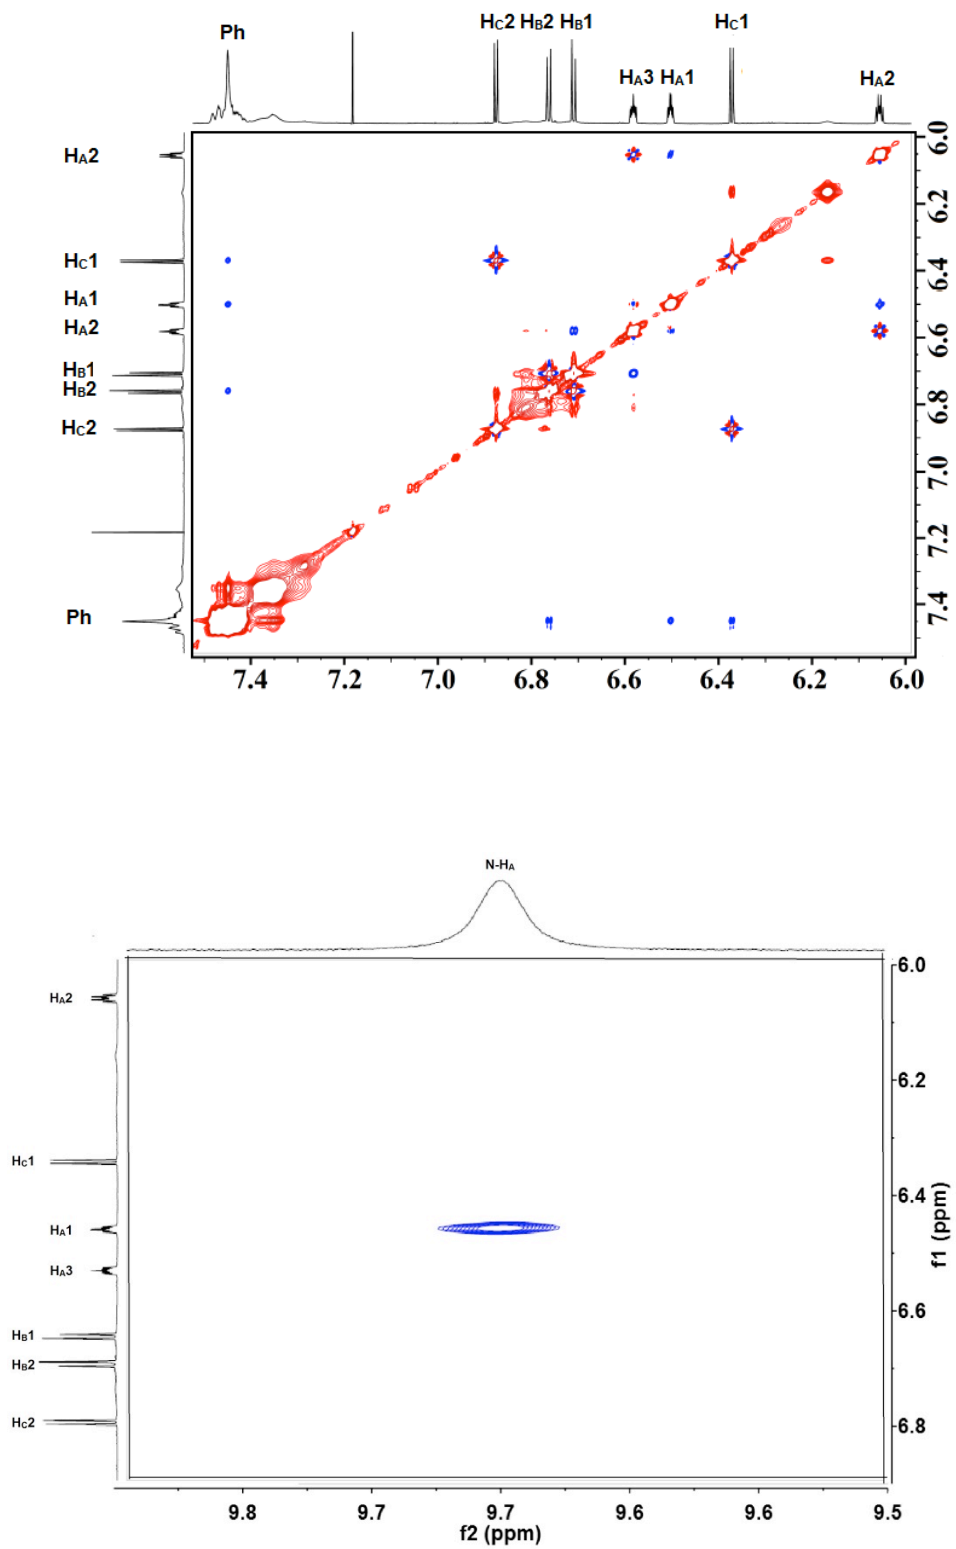

**Figure S6.** 2D NOESY NMR plots for Zn(HPD1)<sub>2</sub> (600 MHz, CDCl<sub>3</sub>, 27 °C, 11 mM).

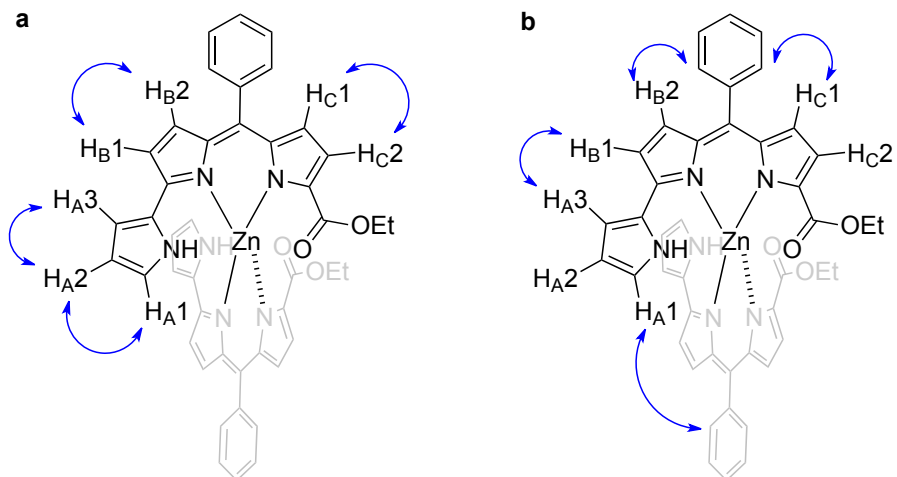

**Scheme S2.** Structure of complex  $Zn(HPD1)_2$  based on correlations observed in COSY (a) and NOESY (b) 2D NMR data.



## X-Ray Diffraction Analysis

Crystal data for  $C_{44}H_{36}N_6O_4Zn$ .  $M_r = 778.18$ ,  $0.05 \times 0.04 \times 0.01$  mm, triclinic, space group  $P-1$  (No. 2),  $a = 9.7497(6)$ ,  $b = 13.8451(9)$ ,  $c = 13.8646(9)$  Å,  $\alpha = 84.270(2)$ ,  $\beta = 76.557(2)$ ,  $\gamma = 81.568(2)^\circ$ ,  $V = 1796.4(2)$  Å<sup>3</sup>,  $Z = 2$ ,  $\rho_{\text{calc}} = 1.439$  g/cm<sup>3</sup>,  $F_{000} = 808$ , Mo-K $\alpha$  radiation,  $\lambda = 0.71073$  Å,  $T = 120(2)$  K,  $2\theta_{\text{max}} = 50.1^\circ$ , 23528 reflections collected, 6371 unique ( $R_{\text{int}} = 0.1018$ ). Final  $Goof = 1.006$ ,  $R_1 = 0.0592$ ,  $wR_2 = 0.1051$ ,  $R$  indices based on 3866 reflections with  $I > 2\sigma[I]$  (refinement on  $F^2$ ), 498 parameters, 0 restraints. Lp and absorption corrections applied,  $\mu = 0.739$  mm<sup>-1</sup>.

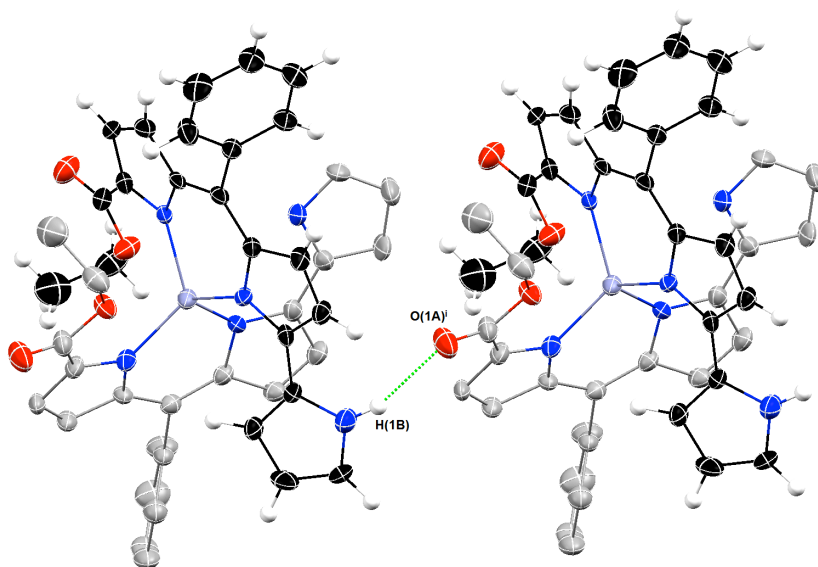

**Figure S7.** Intermolecular hydrogen bond between two  $Zn(HPD1)_2$  complexes ( $i = x-1, y, z$ ).

Crystal data for  $C_{22}H_{20.60}CuN_3O_{3.8}$ .  $M_r = 450.45$ ,  $0.20 \times 0.02 \times 0.01$  mm, monoclinic, space group  $P2_1/c$  (No. 14),  $a = 16.847(4)$ ,  $b = 16.690(4)$ ,  $c = 7.3211(18)$  Å,  $\beta = 100.475(7)^\circ$ ,  $V = 2024.2(8)$  Å<sup>3</sup>,  $Z = 4$ ,  $D_c = 1.481$  g/cm<sup>3</sup>,  $F_{000} = 932$ , Mo-K  $\alpha$  radiation,  $\lambda = 0.71073$  Å,  $T = 120(2)$ K,  $2\theta_{\text{max}} = 39.6^\circ$ , 13467 reflections collected, 1822 unique ( $R_{\text{int}} = 0.1239$ ). Final  $Goof = 1.080$ ,  $R_1 = 0.0569$ ,  $wR_2 = 0.2189$ ,  $R$  indices based on 1267 reflections  $I > 2\sigma[I]$  (refinement on  $F^2$ ), 266 parameters, 7 restraints. Lp and absorption corrections applied,  $\mu = 1.112$  mm<sup>-1</sup>.

**Table S1.** Crystal data collection parameters for complexes Cu(PD1) and Zn(HPD1)<sub>2</sub>

|                                           | <b>Cu(PD1)</b>                                                       | <b>Zn(HPD1)<sub>2</sub></b>                                      |
|-------------------------------------------|----------------------------------------------------------------------|------------------------------------------------------------------|
| Molecular formula                         | C <sub>22</sub> H <sub>20.60</sub> CuN <sub>3</sub> O <sub>3.8</sub> | C <sub>44</sub> H <sub>36</sub> N <sub>6</sub> O <sub>4</sub> Zn |
| Formula weight [g.mol <sup>-1</sup> ]     | 450.45                                                               | 778.16                                                           |
| Temperature [K]                           | 120(2)                                                               | 120.15                                                           |
| Crystal class                             | monoclinic                                                           | triclinic                                                        |
| Space group                               | P2 <sub>1</sub> /c                                                   | P-1                                                              |
| a [Å]                                     | 16.847(4)                                                            | 9.7497(6)                                                        |
| b [Å]                                     | 16.690(4)                                                            | 13.8451(9)                                                       |
| c [Å]                                     | 7.3211(18)                                                           | 13.8646(9)                                                       |
| α [°]                                     | 90.00                                                                | 84.270(2)                                                        |
| β [°]                                     | 100.475(7)                                                           | 76.557(2)                                                        |
| γ [°]                                     | 90.00                                                                | 81.568(2)                                                        |
| Volume [Å <sup>3</sup> ]                  | 2024.2(8)                                                            | 1796.4(2)                                                        |
| Z                                         | 4                                                                    | 2                                                                |
| ρ <sub>calc</sub> [g/cm <sup>3</sup> ]    | 1.481                                                                | 1.439                                                            |
| μ [mm <sup>-1</sup> ]                     | 1.112                                                                | 0.739                                                            |
| F(000)                                    | 932.0                                                                | 808.0                                                            |
| Crystal size [mm]                         | 0.2 × 0.02 × 0.01                                                    | 0.05 × 0.04 × 0.01                                               |
| Measured reflections                      | 13467                                                                | 23528                                                            |
| Independent reflections                   | 1822                                                                 | 6371                                                             |
| Independent reflections, $I > 2\sigma[I]$ | 1267                                                                 | 3866                                                             |
| $R_{\text{int}}$                          | 0.1239                                                               | 0.1018                                                           |
| $R_{\sigma}$                              | 0.0823                                                               | 0.1248                                                           |
| Goodness-of-fit on F <sup>2</sup>         | 1.080                                                                | 1.005                                                            |
| $R_1, I > 2\sigma[I]^a$                   | 0.0569                                                               | 0.0592                                                           |
| $wR_2$ , all data <sup>b</sup>            | 0.2186                                                               | 0.1251                                                           |
| peak/hole [e Å <sup>-3</sup> ]            | 0.86/-0.53                                                           | 0.68/-0.45                                                       |

$$^a R = \sum[|F_o| - |F_c|] / \sum |F_o|$$

$$^b wR = [\sum w(F_o^2 - F_c^2) / \sum wF_o^4]^{1/2}$$

## EPR and Pulsed ENDOR Analysis of Cu(PD1) in Solution

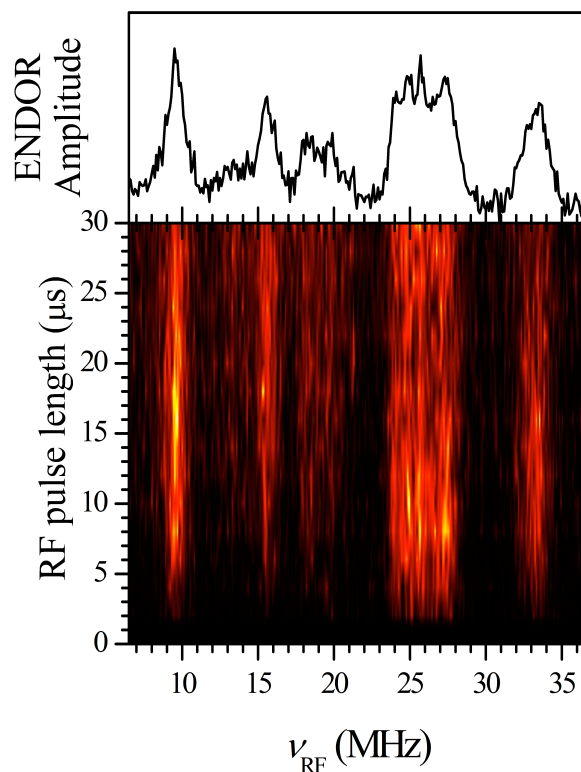

**Figure S8.**  $^{14}\text{N}$  Davies ENDOR spectrum of Cu(PD1) solution in toluene. The experiment was performed in a 2D fashion,  $\nu_{\text{RF}}$  vs. the RF pulse length,  $t_{\text{RF}}$ , and the obtained 2D spectrum is shown in the bottom panel. This 2D spectrum was integrated over  $t_{\text{RF}}$  to obtain the 1D spectrum shown in the top panel. Experimental conditions: mw frequency, 30.360 GHz; magnetic field,  $B_0 = 970$  mT (marked by an asterisk in Fig. 4b of the manuscript); mw pulses, 160, 80, and 160 ns; time interval between the 1st and 2nd mw pulses, 36  $\mu\text{s}$ ; time interval between the 2nd and 3rd mw pulses, 400 ns;  $t_{\text{RF}}$  variation range, 2 – 32  $\mu\text{s}$ ; temperature, 15 K.
